# Supplementary material for: Oxygen defect-induced localized surface plasmon resonance at the WO3−x quantum dot/silver nanowire interface: SERS and photocatalysis
Source: Royal Society of Chemistry journal article supplement (doi:10.1039/c9nr01059a), 2019-01-01
Supplement: c9nr01059a1.pdf [file c9nr01059a1.pdf]

## Supporting Information

### Oxygen Defect-induced Localized Surface Plasmon Resonance in WO<sub>3-x</sub>

#### Quantum Dot/Silver Nanowire Interface: Photocatalysis and SERS

Wei Wei,<sup>‡a</sup> Yongji Yao,<sup>‡a</sup> Qi Zhao,<sup>a</sup> Zhilong Xu<sup>a</sup>, Qinfan Wang<sup>a</sup>, Zongtao Zhang<sup>b</sup> and Yanfeng Gao<sup>\*a</sup>

<sup>a</sup>School of Materials Science and Engineering, Shanghai University, Shanghai 200444, People's Republic of China. E-mail: yfgao@shu.edu.cn

<sup>b</sup>School of Materials Science and Engineering, Zhengzhou University, Zhengzhou, Henan, 450001, People's Republic of China.

<sup>‡</sup>Contributed equally to this work.

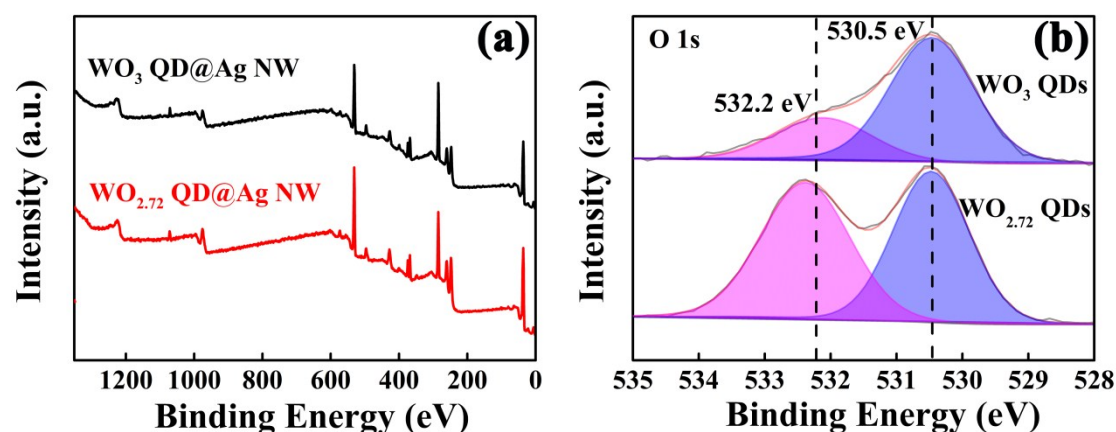

**Figure S1.** XPS spectra of WO<sub>2.72</sub> QD@Ag NW and WO<sub>3</sub> QD@Ag NW: (a) survey spectra and (b) high-resolution O 1s spectra.

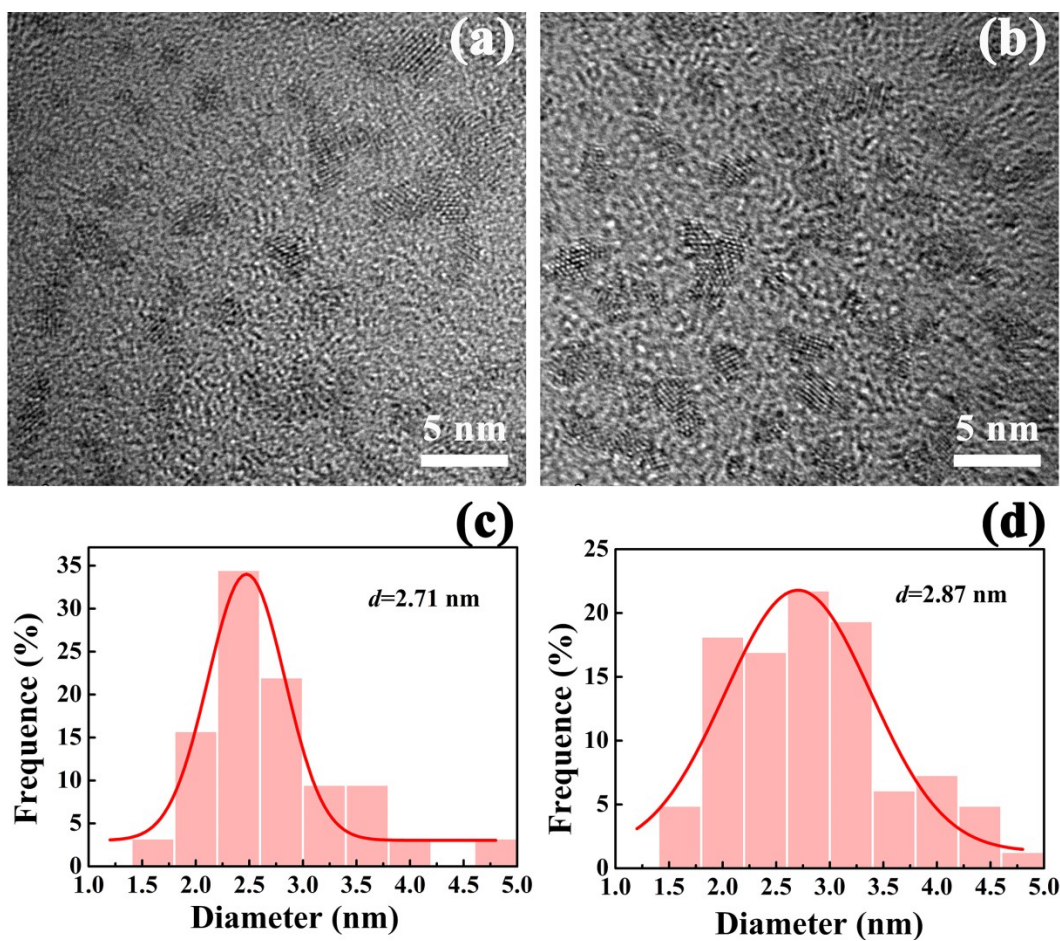

**Figure S2.** TEM images of (a)  $\text{WO}_3$  QDs and (b)  $\text{WO}_{2.72}$  QDs. Diameter distributions of (c)  $\text{WO}_3$  QDs and (d)  $\text{WO}_{2.72}$  QDs.

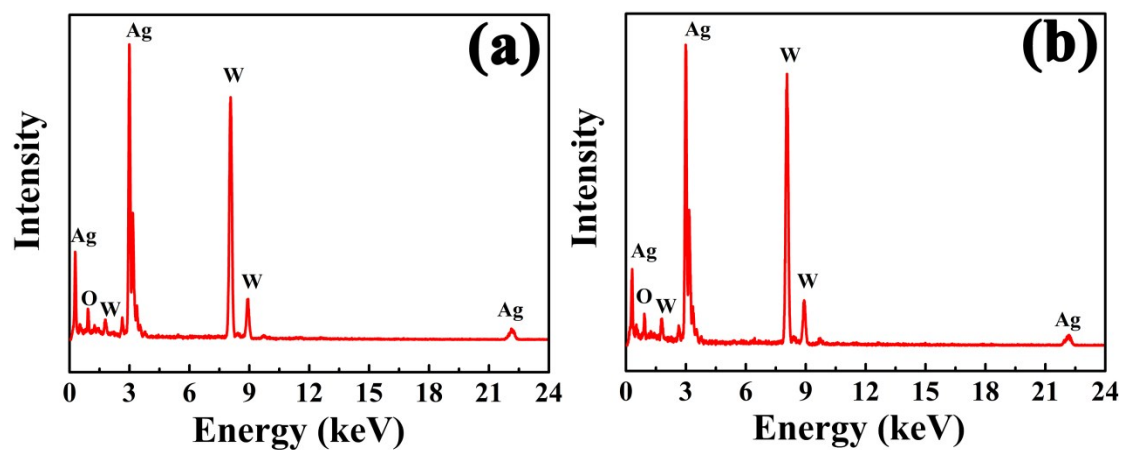

**Figure S3.** EDS spectra of (a)  $\text{WO}_3$  QD@Ag NW hybrids in Figure 2a, and (b)  $\text{WO}_{2.72}$  QD@Ag NW hybrids in Figure 2b.

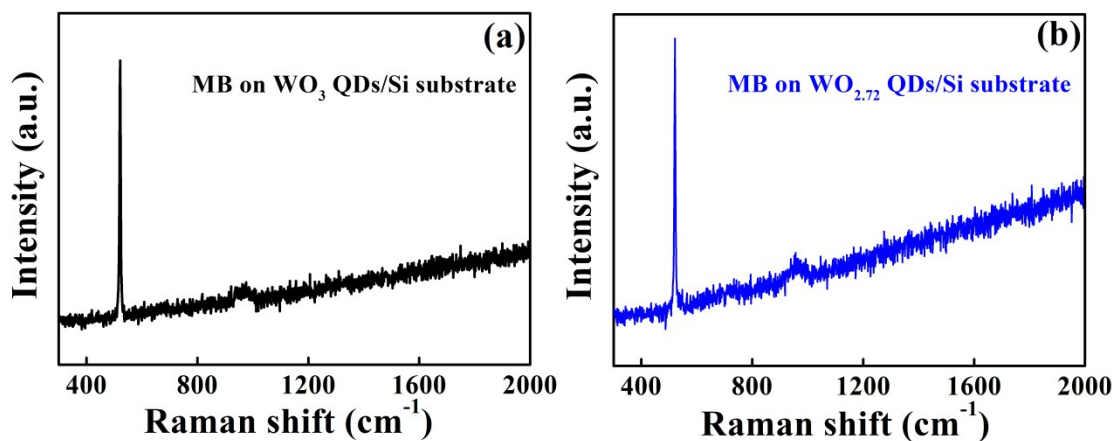

**Figure S4.** Raman spectra of (a) MB on  $\text{WO}_3$  QDs/Si substrate and (b) MB on  $\text{WO}_{2.72}$  QDs/Si substrate. Herein, ten microlitres of Methylene blue (MB) with a fixed concentration ( $1 \times 10^{-6}$  M) was added dropwise onto the surface of the as-prepared  $\text{WO}_{3-x}$  QD@Ag NW substrate and then measured at an excitation wavelength of 633 nm.

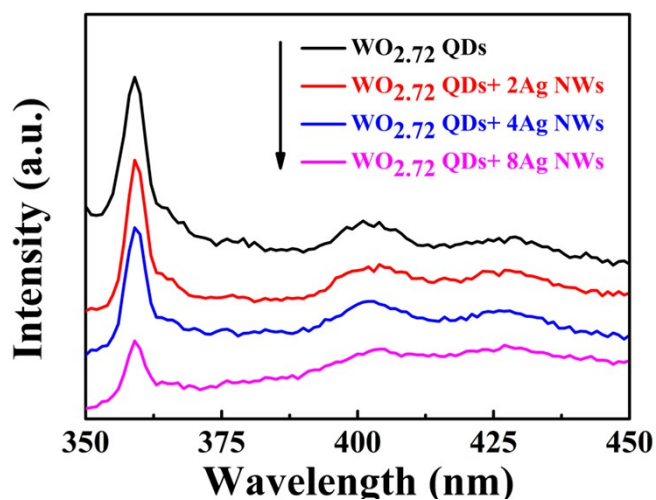

**Figure S5.** PL spectra of  $\text{WO}_{2.72}$  QDs and  $\text{WO}_{2.72}$  QD@Ag NW with an excitation light of 325 nm.

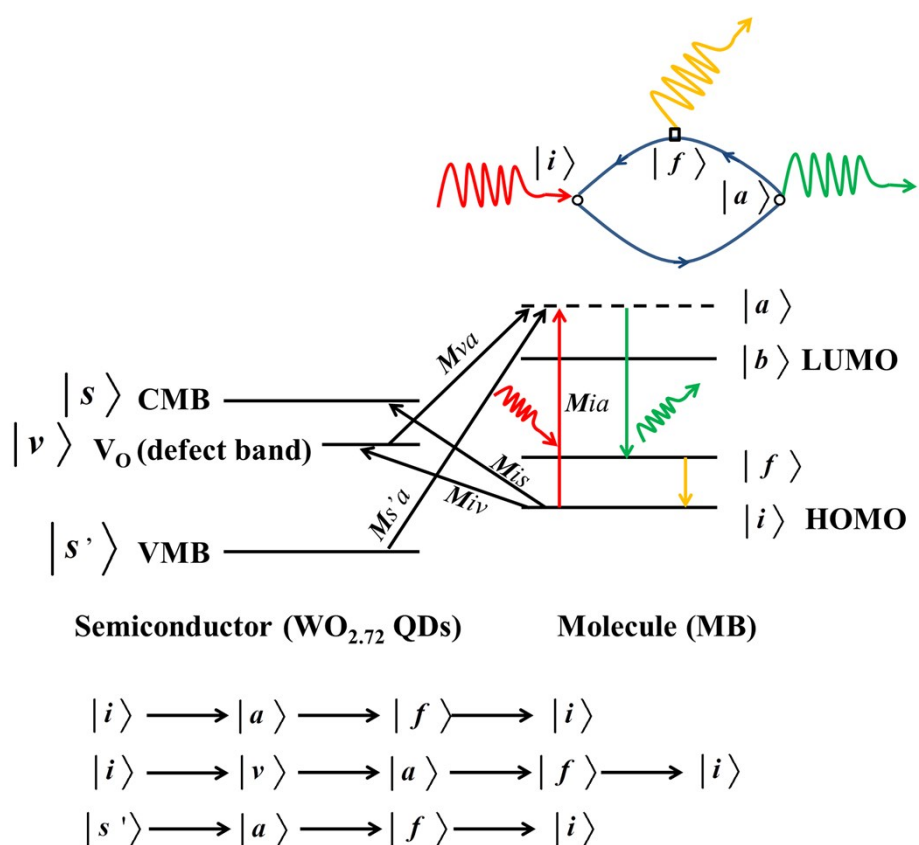

**Figure S6.** The scheme of a Raman scattering process described by Feynman figure, and the photo-induced charge transfer of semiconductor-to-molecule and molecule-to-semiconductor for a defect-rich semiconductor.

A Raman scattering process of MB molecule can be illustrated by the Feynman figure (Figure S5). An ordinary Raman scattering process includes the following aspects as the quantum theory: (1) the photon-electron interaction in ground state (LOMO), electrons gain energy and jump to excited state; (2) the electrons transition from excited state to final state, resulting in the generation of photons (scattering light); (3) the coupling between phonons (or vibrational mode) and electrons, these electrons fall back to the ground state. According to the Fermi's golden rule, the Raman scattering probability ( $P_s$ ) is proportional to the one-to-many transition probability per unit of time from the initial state  $|i\rangle$  to a set of final states  $|f\rangle$ . The Raman scattering intensity ( $I_s$ ) as given by the Golden Rule will be:<sup>1</sup>

$$I_s \propto P_s = \frac{2\pi}{\hbar} \left| \frac{\langle i | H_{\text{e-ph}} | f \rangle \langle f | H_{\text{e-r}}(\omega_s) | a \rangle \langle a | H_{\text{e-r}}(\omega_i) | i \rangle}{[(\hbar\omega_i - (E_a - E_i))][\hbar\omega_i - \hbar\omega_0 - (E_f - E_i)]} \right|^2 \delta(\hbar\omega_i - \hbar\omega_s - \hbar\omega_0) \quad (\text{S1})$$

where  $|i\rangle$  and  $|f\rangle$  represent the initial state and final state of electrons, respectively.  $|a\rangle$  represent the excited state.  $H_{\text{e-r}}$  and  $H_{\text{e-ph}}$  are the Hamiltonian matrix of radiation light and electron-phonon coupling.  $E_a$  and  $E_i$  is the energy of excited state  $|a\rangle$  and ground state  $|i\rangle$ .  $\hbar\omega_i$ ,  $\hbar\omega_s$  and  $\hbar\omega_0$  is the energy of the incident photon, scattered photon and emitted phonon respectively. However, in the defect-rich semiconductor-molecule system, the contribution of photo-induced charge transfer (PICT) to Raman scattering must be taken into consideration.<sup>2</sup> The rich oxygen vacancies in  $\text{WO}_{2.72}$  QDs can introduce new electronic states (Figure S9), which benefit to the Raman scattering. Here, we use  $|s'\rangle$  to denote electronic state the top of the valence band, and  $|v\rangle$  represent the oxygen defect state lying in the forbidden band. These electronic states in lattice or surface provide two new pathways for electron transfer: (1)  $|i\rangle \rightarrow |v\rangle \rightarrow |a\rangle \rightarrow |f\rangle \rightarrow |i\rangle$ ; (2)  $|s'\rangle \rightarrow |a\rangle \rightarrow |f\rangle \rightarrow |i\rangle$ .<sup>3</sup> With a similar approach, we write:

$$I_s \propto P_s = \frac{2\pi}{\hbar} |A + B + C|^2 \delta(\hbar\omega_i - \hbar\omega_s - \hbar\omega_0) \quad (\text{S2})$$

$$A = \frac{\langle i | H_{\text{e-ph}} | f \rangle \langle f | H_{\text{e-r}}(\omega_s) | a \rangle \langle a | H_{\text{e-r}}(\omega_i) | i \rangle}{[(\hbar\omega_i - (E_a - E_i))][\hbar\omega_i - \hbar\omega_0 - (E_f - E_i)]} \quad (\text{S3})$$

$$B = \frac{\langle i | H_{\text{e-ph}} | f \rangle \langle f | H_{\text{e-r}}(\hbar\omega_s) | a \rangle \langle a | H_{\text{e-r}}(\hbar\omega_i) | v \rangle \langle v | H_{\text{e-r}}(\hbar\omega_i) | i \rangle}{[(\hbar\omega_i - (E_a - E_i))][\hbar\omega_i - \hbar\omega_0 - (E_f - E_i)]} \quad (\text{S4})$$

$$C = \frac{\langle i | H_{\text{e-ph}} | f \rangle \langle f | H_{\text{e-r}}(\hbar\omega_s) | a \rangle \langle a | H_{\text{e-r}}(\hbar\omega_i) | s' \rangle}{[(\hbar\omega_i - (E_a - E_{s'}))][\hbar\omega_i - \hbar\omega_0 - (E_f - E_{s'})]} \quad (\text{S5})$$

here A represents the contribution of adsorbed molecular resonance, which is independent of the defect states in the semiconductor. B represents the contribution of

PICT, which is resulted from defect states in the semiconductor-molecular system, especially in the irradiated  $\text{WO}_{2.72}$  QDs, more electrons occupied the oxygen defect state helped to increase the transition probability of photon-generated electrons. C represents the contribution of PICT from valance state to an excited state of the molecule.

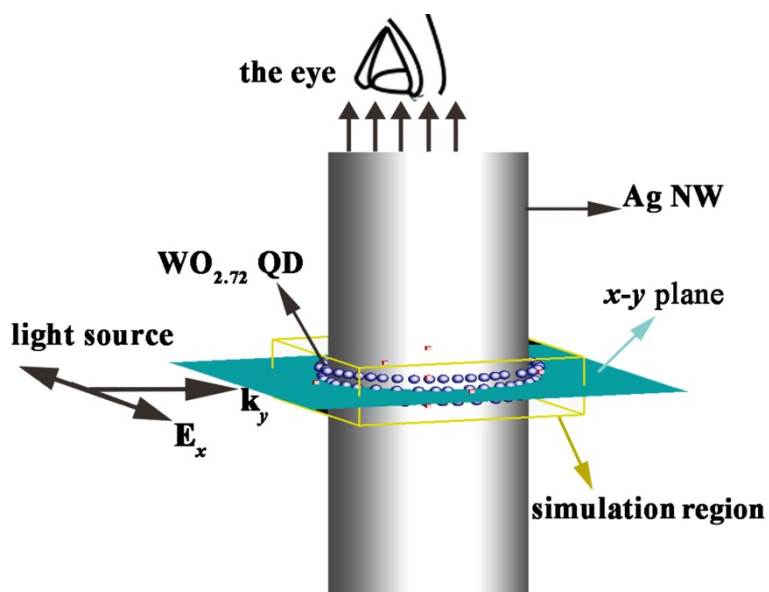

**Figure S7.** Schematic diagram of FDTD simulation for  $\text{WO}_{2.72}$  QD@Ag NW structure. The spatial electric field distribution maps in the  $x$ - $y$  plane were extracted from this calculations. The diameter of  $\text{WO}_{2.72}$  QD and Ag NW are 2.8 nm and 50 nm, respectively.

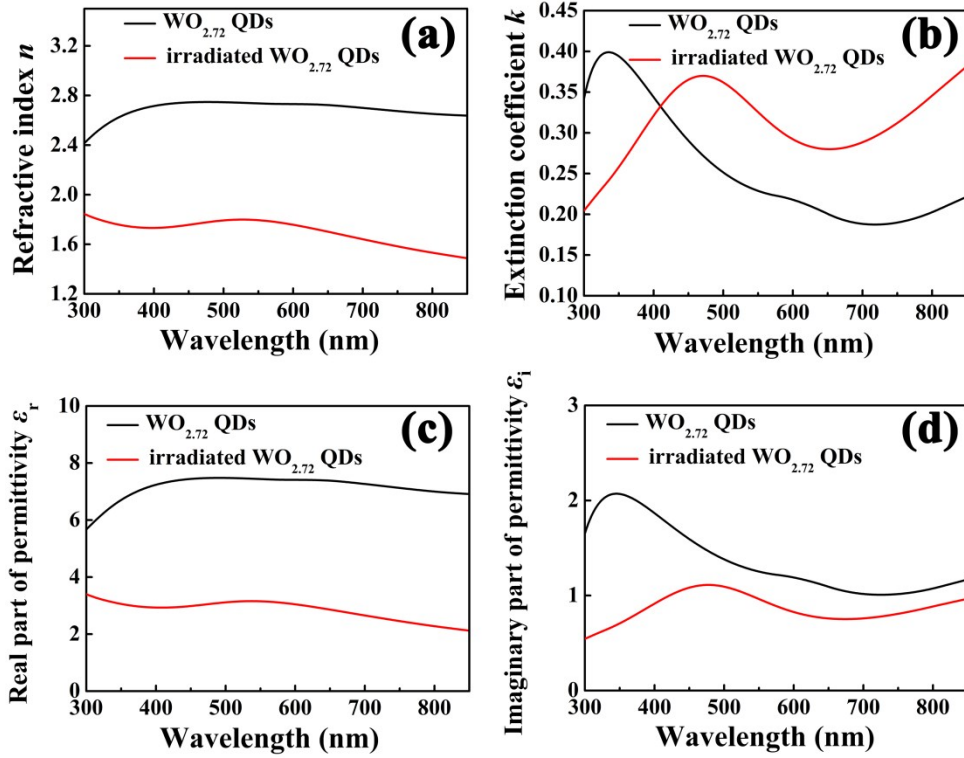

**Figure S8.** (a) Refractive index  $n$ , (b) extinction coefficient  $k$ , (c) real part of permittivity  $\epsilon_r$  and (d) imaginary part of permittivity  $\epsilon_i$  of  $\text{WO}_{2.72}$  QDs and irradiated  $\text{WO}_{2.72}$  QDs.

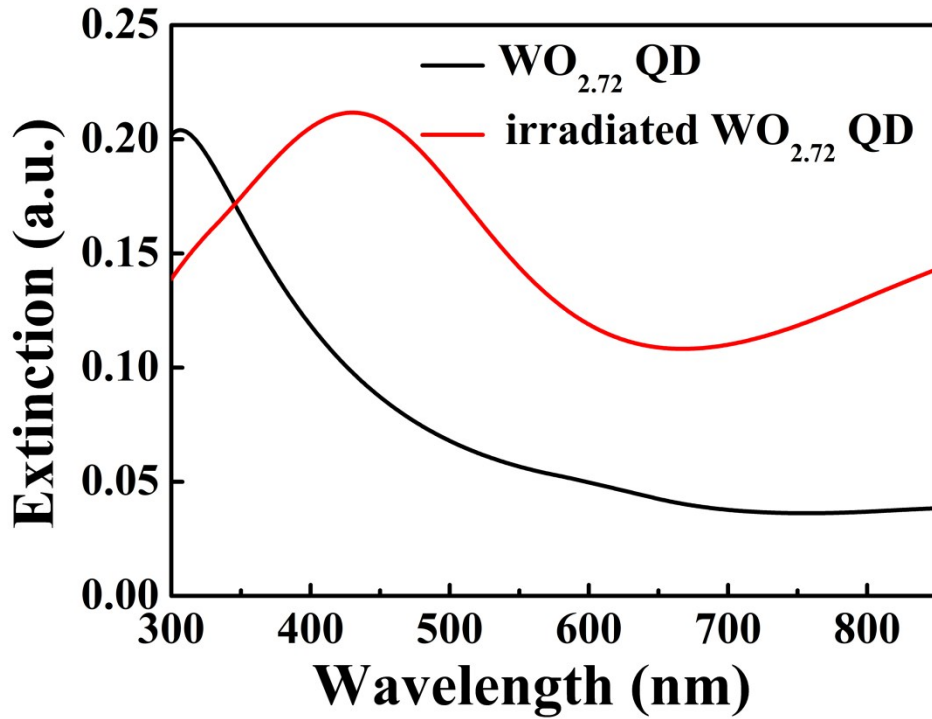

**Figure S9.** The simulated extinction spectrum of a  $\text{WO}_{2.72}$  QD of radius  $a=1.4$  nm in air. This result has same trends as the measured UV-vis absorption spectra of  $\text{WO}_{2.72}$  QDs dispersion (in ethanol).

In this simulation, we consider a spherical WO<sub>2.72</sub> QD of radius  $a=1.4$  nm that is irradiated by  $x$ -polarized light of wavelength  $\lambda$  (Figure S6). The extinction spectrum of the single WO<sub>2.72</sub> QD can be calculated as follow:<sup>4,5</sup>

$$E(\lambda) = \frac{24\pi^2 a^3 \varepsilon_{out}^{3/2}}{\lambda \ln(10)} \left[ \frac{\varepsilon_i(\lambda)}{(\varepsilon_r(\lambda) + \chi \varepsilon_{out})^2 + \varepsilon_i(\lambda)} \right] \quad (S6)$$

here,  $\varepsilon_r$  and  $\varepsilon_i$  are the real and imaginary components of the dielectric constant (in Figure S7), respectively.  $\varepsilon_{out}$  is the external dielectric constant ( $\varepsilon_{out}=1$  for air),  $\lambda$  is the wavelength of the incident  $x$ -polarized light. The value of factor  $\chi$  is 2 for the case of a sphere.

## References

1. P. Y. Yu and M. Cardona, *Fundamentals of Semiconductors: Physics and Materials Properties*, Springer, Heidelberg, 2005.
2. S. Cong, Y. Yuan, Z. Chen, J. Hou, M. Yang, Y. Su, Y. Zhang, L. Li, Q. Li, F. Geng, Z. Zhao, *Nat. Commun.*, 2015, **6**, 7800.
3. J. R. Lombardi, R. L. Birke, *J. Phys. Chem. C*, 2014, **118**, 11120-11130.
4. K. A. Willets, R. P. Van Duyne, *Annu. Rev. Phys. Chem.*, 2007, **58**, 267-297.
5. C. F. Bohren, D. R. Huffman, *Absorption and Scattering of Light by Small Particles*, Wiley, New York, 1983.
